# Supplementary material for: Carbon nanotube mat as substrate for ZnO nanotip field emitters
Source: Royal Society of Chemistry journal article supplement (doi:10.1039/c2ra00001f), 2012-01-01
Supplement: c2ra00001f.pdf [file c2ra00001f.pdf]

## Supporting information for review only for

## Carbon nanotube mat as substrate for ZnO nanotip field emitters

R. P. Sugavaneshwar<sup>a</sup>, T. Nagao<sup>b</sup> and K. K. Nanda<sup>a,\*</sup>

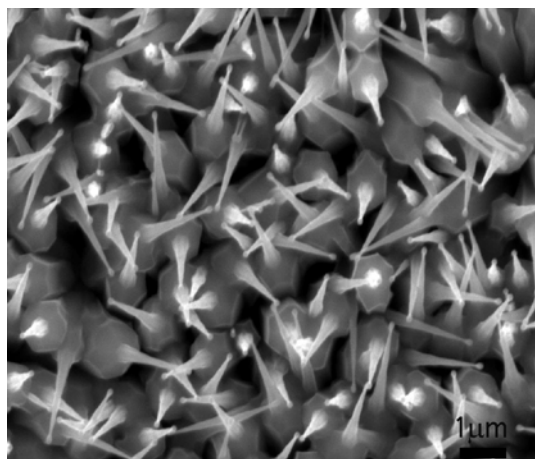

SEM image of ZnO on silicon

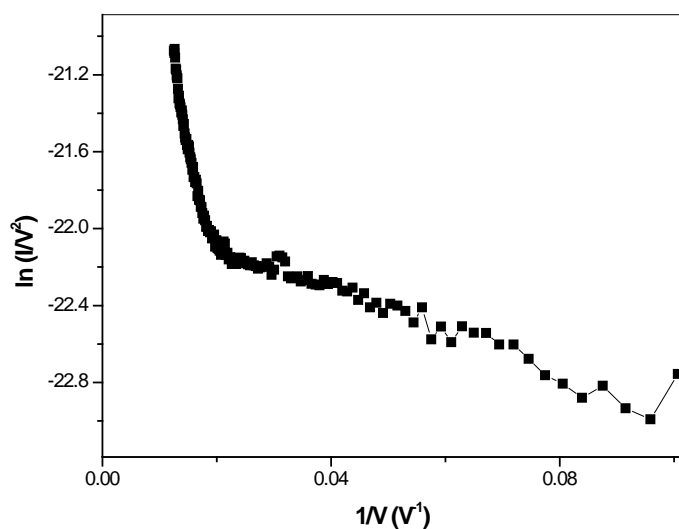

FN plot of ZnO nanotips on MWCNT mat. Linear fit was performed in the high field region and the Value of the slope was found to be -80. Enhancement factor was obtained from the slope of the FN plot.
